# Supplementary figures and images for: Ameliorating Effect of Malva neglecta Wallr on Obesity and Diabetes in Wistar Rats: A Mechanistic Study
Source: Hindawi journal article supplement (doi:10.1155/2022/2614599), 2022-01-01

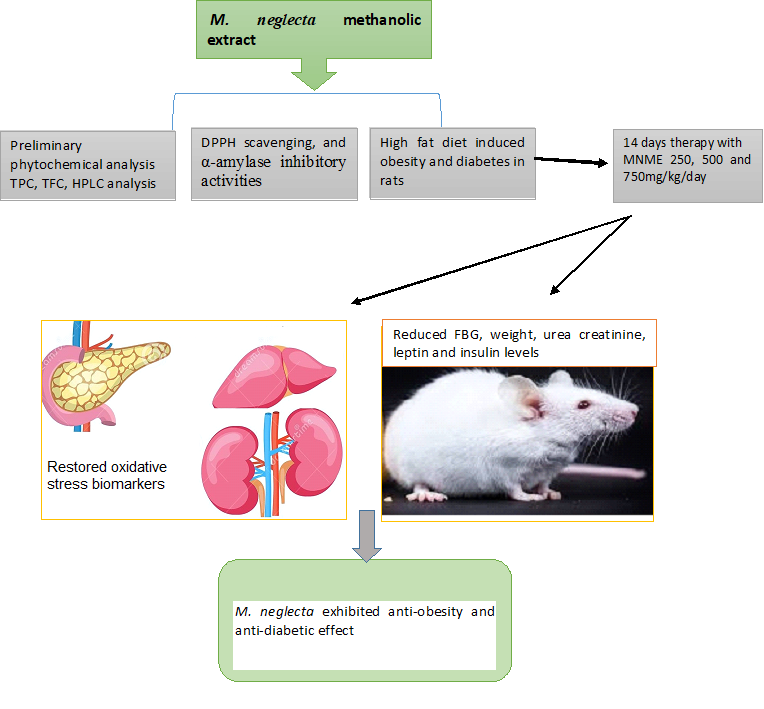


**Graphical abstract**

Supplement: f1 [file 2614599.f1.docx]
